# Supplementary material
Source: PubMed Central journal article supplement (PMC5726802)
Supplement: NIHMS918298-supplement.pdf [file NIHMS918298-supplement.pdf]

**Figure S1**

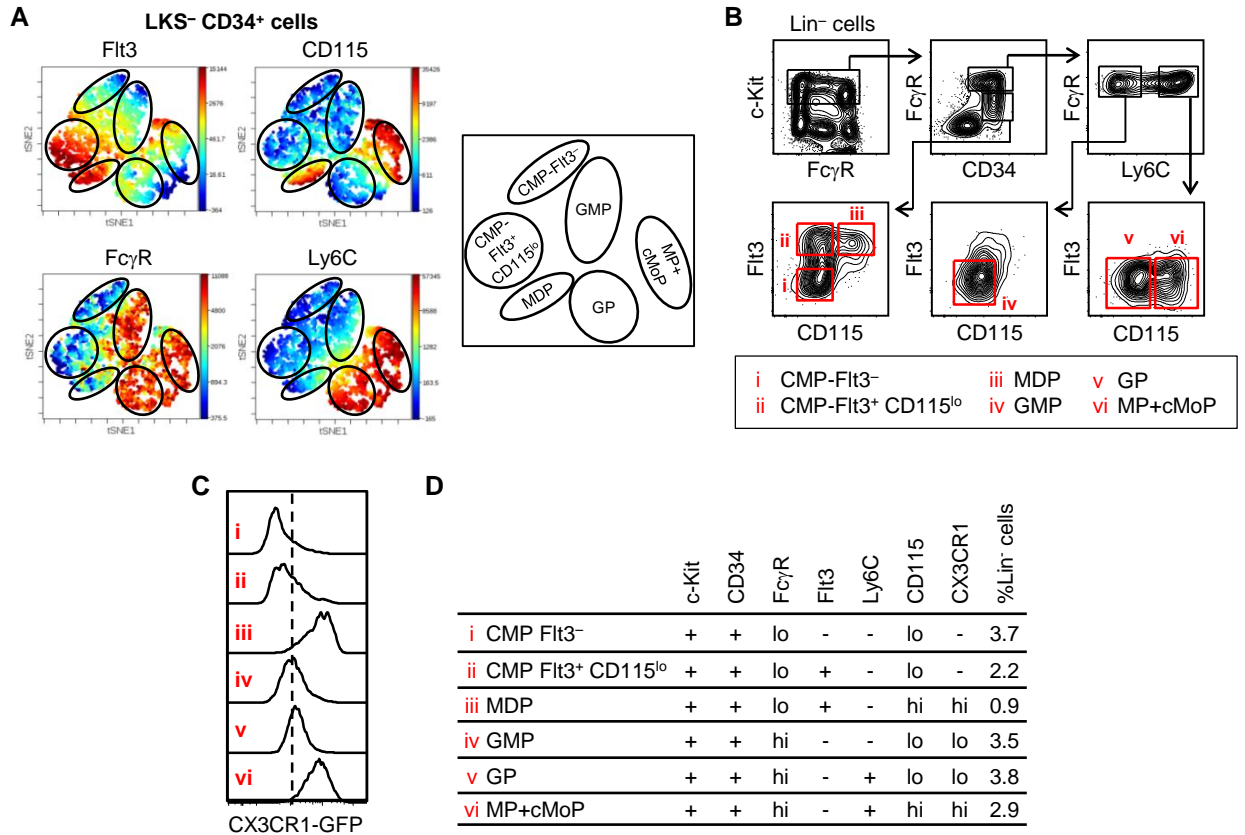

**Figure S1. Characterization of myeloid progenitors from mouse bone marrow. (related to Figure 1)**

(A) MACS-sorted lineage-negative (Lin<sup>-</sup>) mouse bone marrow cells were evaluated by flow cytometry (c-Kit [CD117], Sca-1, CD34, Fc $\gamma$ R [CD16 and CD32], Ly6C, Flt3, CD115). c-Kit<sup>+</sup> Sca-1<sup>-</sup> CD34<sup>+</sup> cells were gated and viSNE analysis was performed using Cytobank. Flt3, CD115, Fc $\gamma$ R and Ly6C expression was visualized in a stacked dot plot of tSNE1 and tSNE2 (left panels) to facilitate identification of progenitor populations (right panel). (B) Flow cytometry gating of bone marrow Lin<sup>-</sup> cells for progenitor identification and sorting. Clear separation of the Fc $\gamma$ R<sup>lo</sup> and Fc $\gamma$ R<sup>hi</sup> gates is very important for optimal separation of the progenitor fractions. (C) CX3CR1 expression by progenitor subsets from CX3CR1-GFP reporter mice was assessed by flow cytometry. (D) Summary of surface marker expression by myeloid progenitor subsets.

**Figure S2**

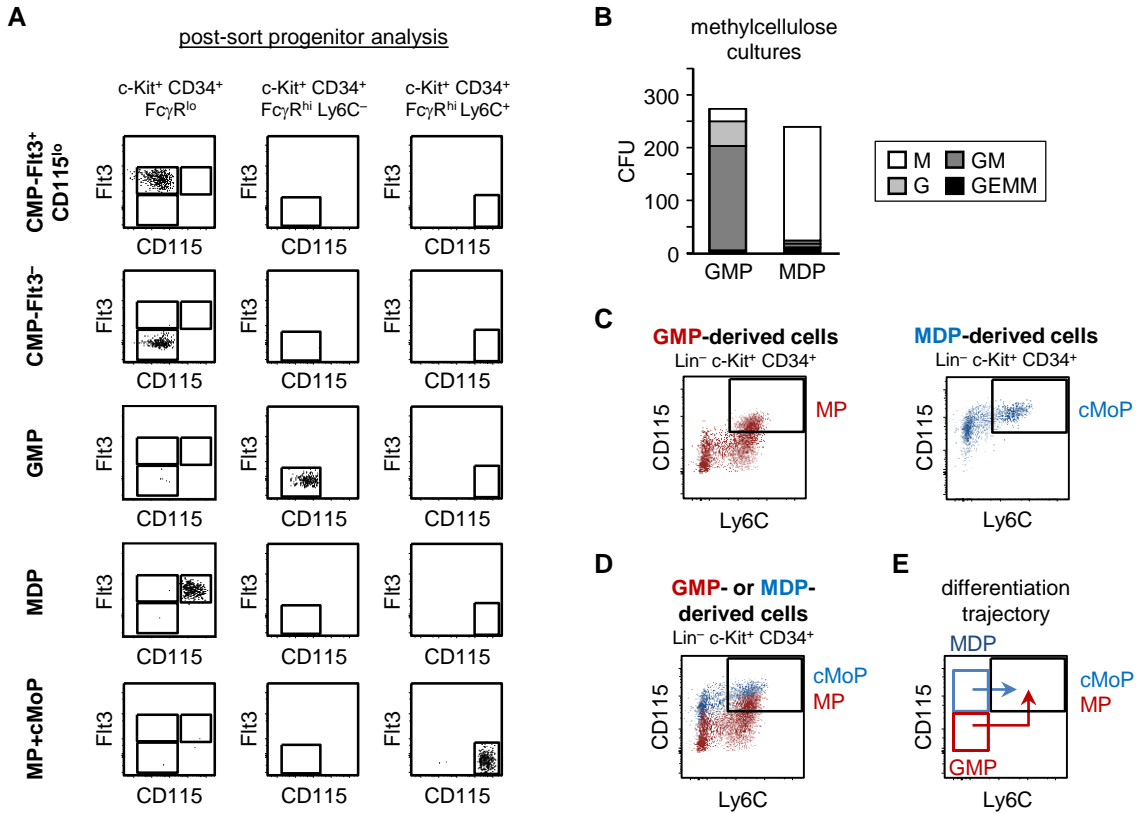

**Figure S2. Characterization of myeloid progenitors from mouse bone marrow. (related to Figure 1)**

(A) Post-sort analysis of progenitor subsets after FACS sorting from mouse bone marrow. (B) 1000 GMPs or MDPs were seeded in methylcellulose medium, and colonies were evaluated 1 week later (M – monocyte, G – granulocyte, GM – granulocyte-monocyte, GEMM – granulocyte-erythrocyte-megakaryocyte-monocyte). (C-D) GMPs and MDPs were cultured *in vitro* with M-CSF for 48 hours, and MP or cMoP production was assessed by flow cytometry (overlaid in D). (E) Trajectory of monocyte-committed progenitor (MP or cMoP) production by GMPs and MDPs.

**Figure S3**

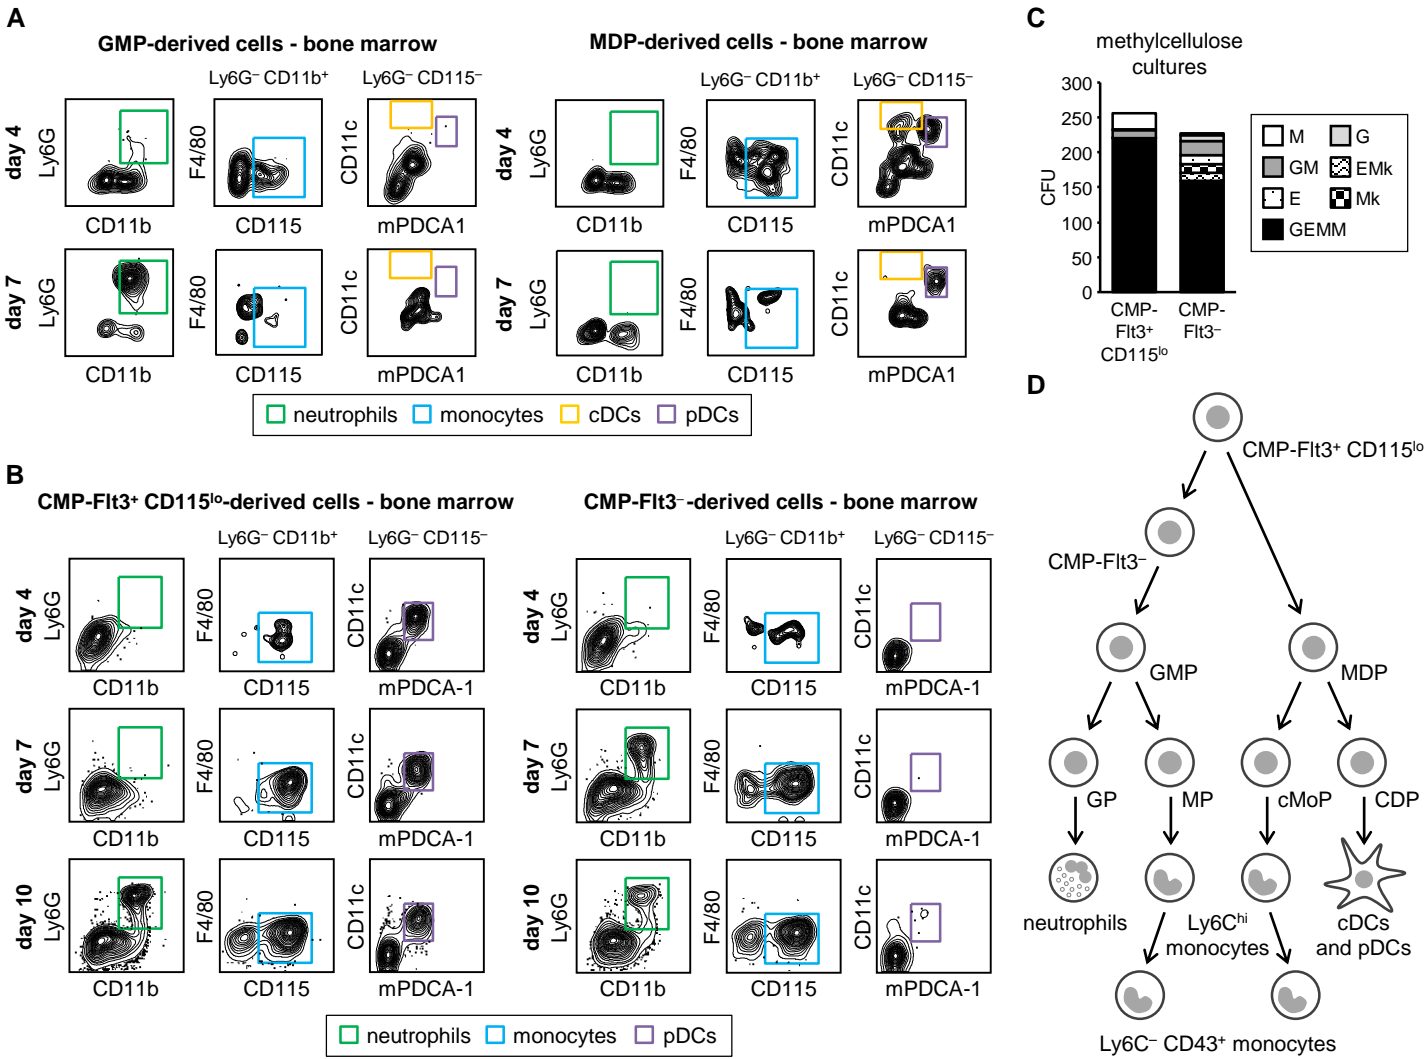

**Figure S3. Myeloid cell production by CMP subsets. (related to Figure 1)**

(A-B) The progeny of adoptively transferred GMPs and MDPs (A) and CMP-Flt3<sup>+</sup> CD115<sup>lo</sup> and CMP-Flt3<sup>-</sup> cells (B) from donor (CD45.2) mice were identified by flow cytometry of recipient (CD45.1) bone marrow cells on the days indicated. (C) 1000 CMP-Flt3<sup>+</sup> CD115<sup>lo</sup> and CMP-Flt3<sup>-</sup> cells per well were plated in methylcellulose media and colonies were counted after 1 week of culture. G – granulocyte, M – monocyte, E – erythrocyte, Mk – megakaryocyte, GM – granulocyte + monocyte, EMk – erythrocyte + megakaryocyte, GEMM – granulocyte + erythrocyte + monocyte + megakaryocyte. (D) Model of neutrophil, monocyte and DC production by CMP-Flt3<sup>+</sup> CD115<sup>lo</sup> cells, with 2 independent pathways of monocyte differentiation via i) CMP-Flt3<sup>-</sup> cells, GMPs and MPs, and ii) MDPs and cMoPs.

**Figure S4**

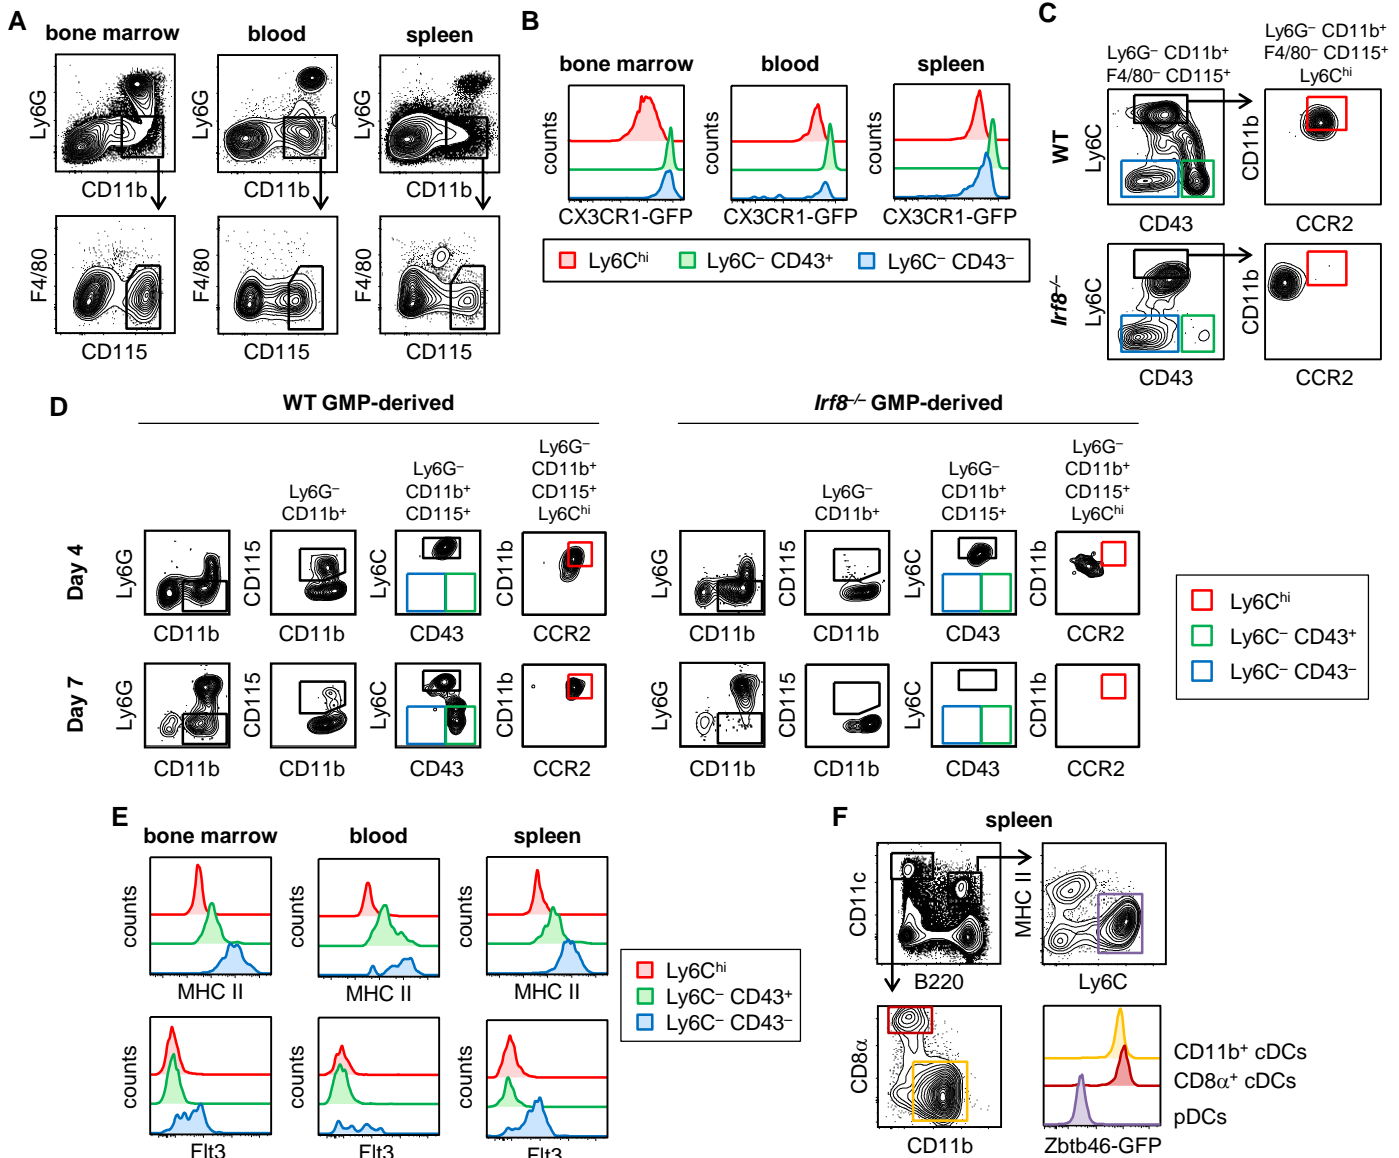

**Figure S4. Profiling of GMP- and MDP-derived monocyte subsets. (related to Figure 2)**

(A) Flow cytometry gating strategy for characterization of CD11b<sup>+</sup> CD115<sup>+</sup> cells in the bone marrow, blood and spleen. (B) CD11b<sup>+</sup> CD115<sup>+</sup> cells from the bone marrow, blood and spleen of CX3CR1-GFP reporter mice were analyzed by flow cytometry to assess CX3CR1 expression by the Ly6C<sup>hi</sup>, Ly6C<sup>-</sup> CD43<sup>+</sup> and Ly6C<sup>-</sup> CD43<sup>-</sup> subsets. (C) For assessment of fully differentiated Ly6C<sup>hi</sup> monocytes in *Irf8*-deficient (plus WT and *Nur77* (*Nr4a1*)-deficient) mice, monocytes were also gated on CCR2<sup>+</sup> cells. (D) Flow cytometry gating strategy for assessing production of the Ly6C<sup>hi</sup> (and CCR2<sup>+</sup>), Ly6C<sup>-</sup> CD43<sup>+</sup> and Ly6C<sup>-</sup> CD43<sup>-</sup> subsets of CD11b<sup>+</sup> CD115<sup>+</sup> cells by adoptively transferred GMPs, MDPs and MPs+cMoPs from CD45.2 donor mice. Gating of GMP-derived cells is shown. (E) MHC II and Flt3 expression by the Ly6C<sup>hi</sup>, Ly6C<sup>-</sup> CD43<sup>+</sup> and Ly6C<sup>-</sup> CD43<sup>-</sup> subsets of CD11b<sup>+</sup> CD115<sup>+</sup> cells from the bone marrow, blood and spleen was assessed by flow cytometry. (F) Expression of Zbtb46 by splenic cDCs and pDCs from Zbtb46-GFP reporter mice was assessed by flow cytometry.

**Figure S5**

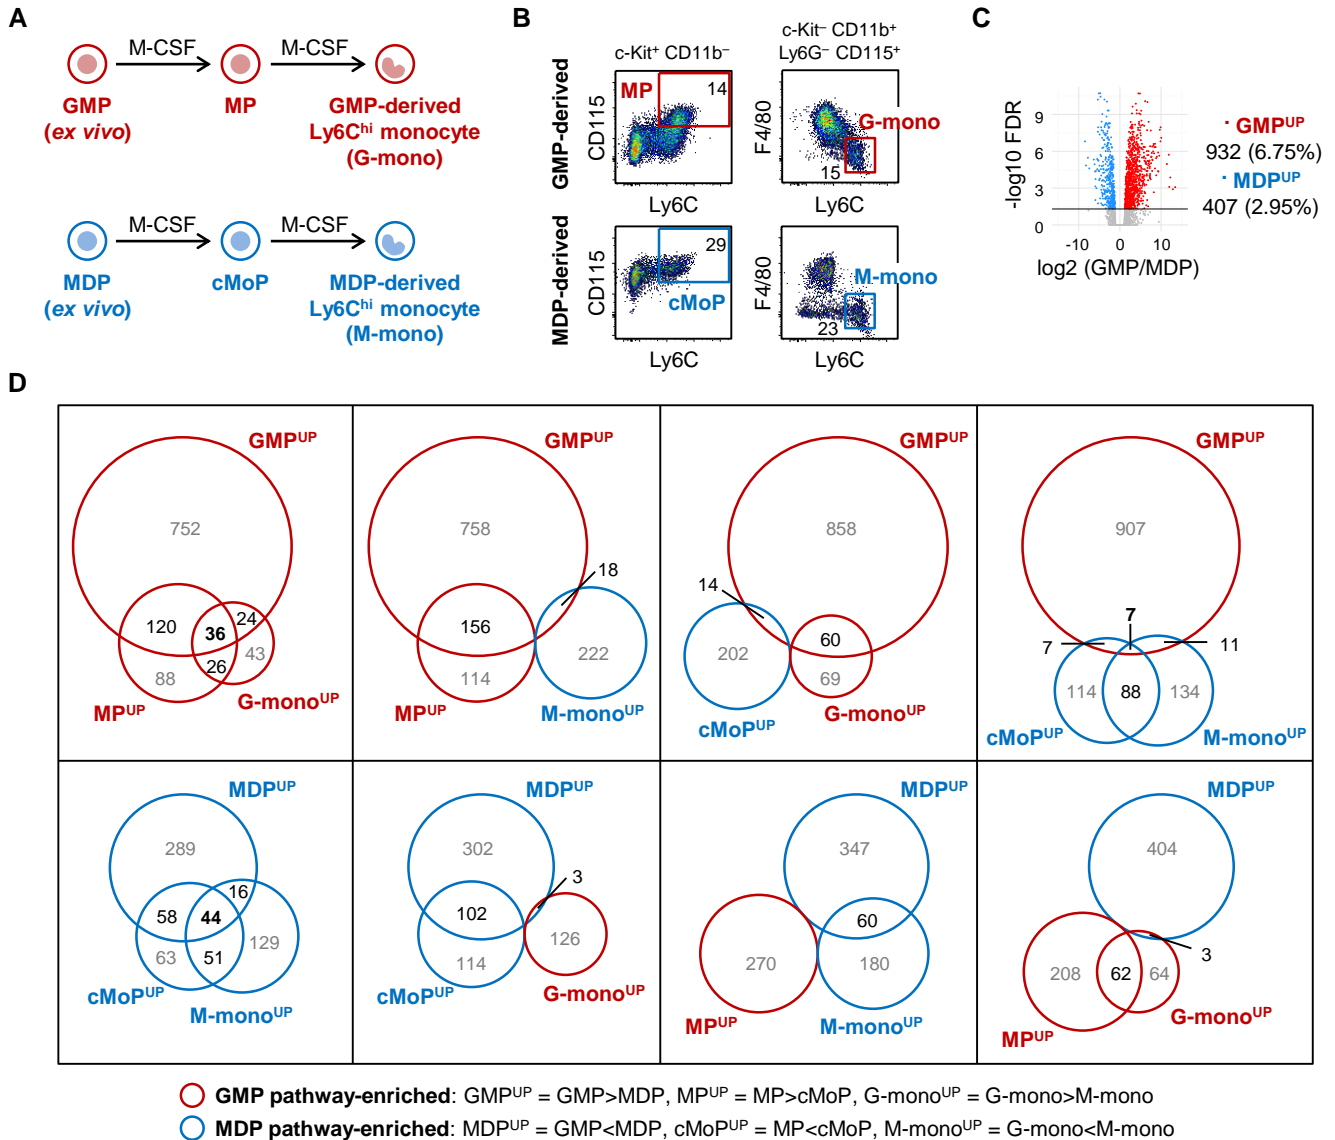

**Figure S5. Isolation of GMP- and MDP-derived cells for RNA sequencing. (related to Figure 3)**

(A-B) GMPs and MDPs isolated from the pooled bone marrow of 20 mice were cultured *in vitro* with M-CSF to derive monocyte-committed progenitors (MPs and cMoPs) and Ly6C<sup>hi</sup> monocytes. Monocyte progenitors and Ly6C<sup>hi</sup> monocytes derived from GMPs (MPs and G-mono) and MDPs (cMoPs and M-mono) were harvested from the cultures on days 2, 3 and 4, and the three timepoint samples were pooled for RNA extraction. RNA was also extracted from the *ex vivo* GMP and MDP fractions from which the monocyte progenitors and monocytes were derived. The whole process was repeated using 20 additional mice to obtain a replicate set of samples. (C) Volcano plot of genes enriched (2-fold, adjusted p value < 0.05) in GMPs (GMP<sup>UP</sup>) versus MDPs (MDP<sup>UP</sup>). The number of enriched genes and percentage of the total genes expressed by GMPs and MDP is indicated. (D) Venn diagrams (plotted to scale) showing overlapping sets of enriched genes (<sup>UP</sup> = enriched in the specified subset compared to its counterpart in the other lineage).

**Figure S6**

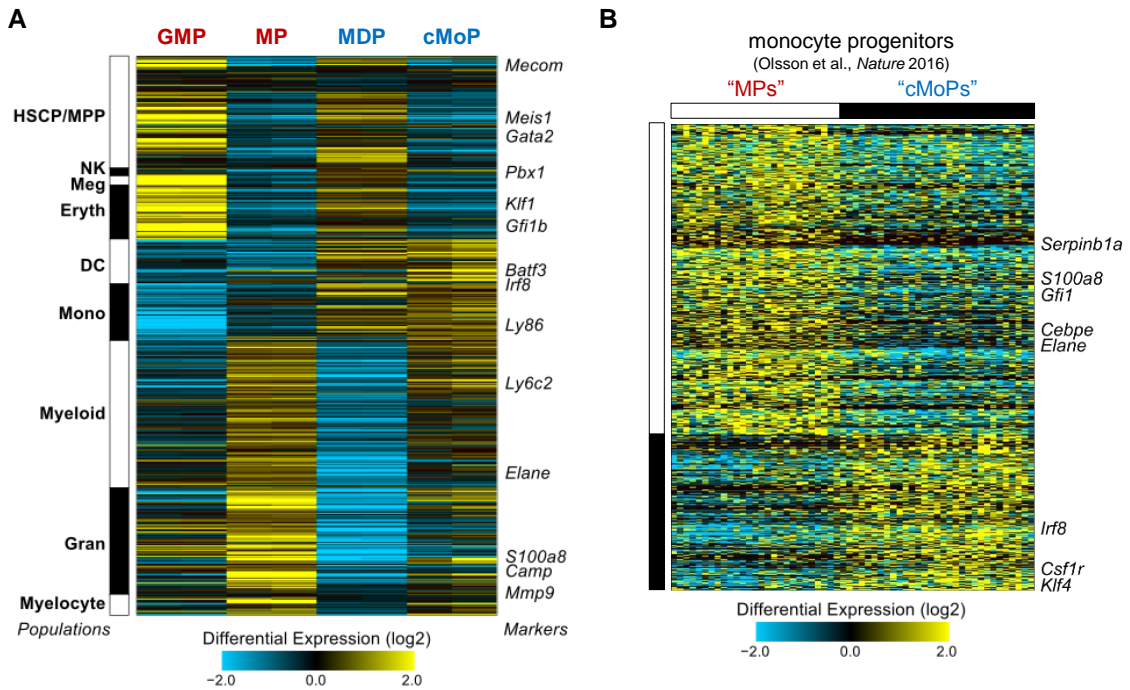

**Figure S6. Profiling of GMP- and MDP-derived monocyte progenitor subsets. (related to Figure 3)**

(A) Gene expression by the progenitors (GMPs, MPs, MDPs and cMoPs) was viewed through the lens of progenitor population-specific genes and selected markers previously defined in a single-cell RNA sequencing study (Olsson et al., 2016). All genes with an RPKM>1 are shown. HSCP/MPP – hematopoietic stem cell progenitor, NK – natural killer cell, Meg – megakaryocyte, Eryth – erythrocyte, DC – dendritic cell, Mono – monocyte, Gran – granulocyte, Myelocyte – myelocyte and metamyelocyte. (B) Heatmap of differential gene expression (2-fold,  $p < 0.05$ ) by the presumed MPs and cMoPs (“MPs” and “cMoPs”) among the 58 previously identified monocyte progenitors profiled by single-cell RNA sequencing (Olsson et al., 2016).



**Figure S7**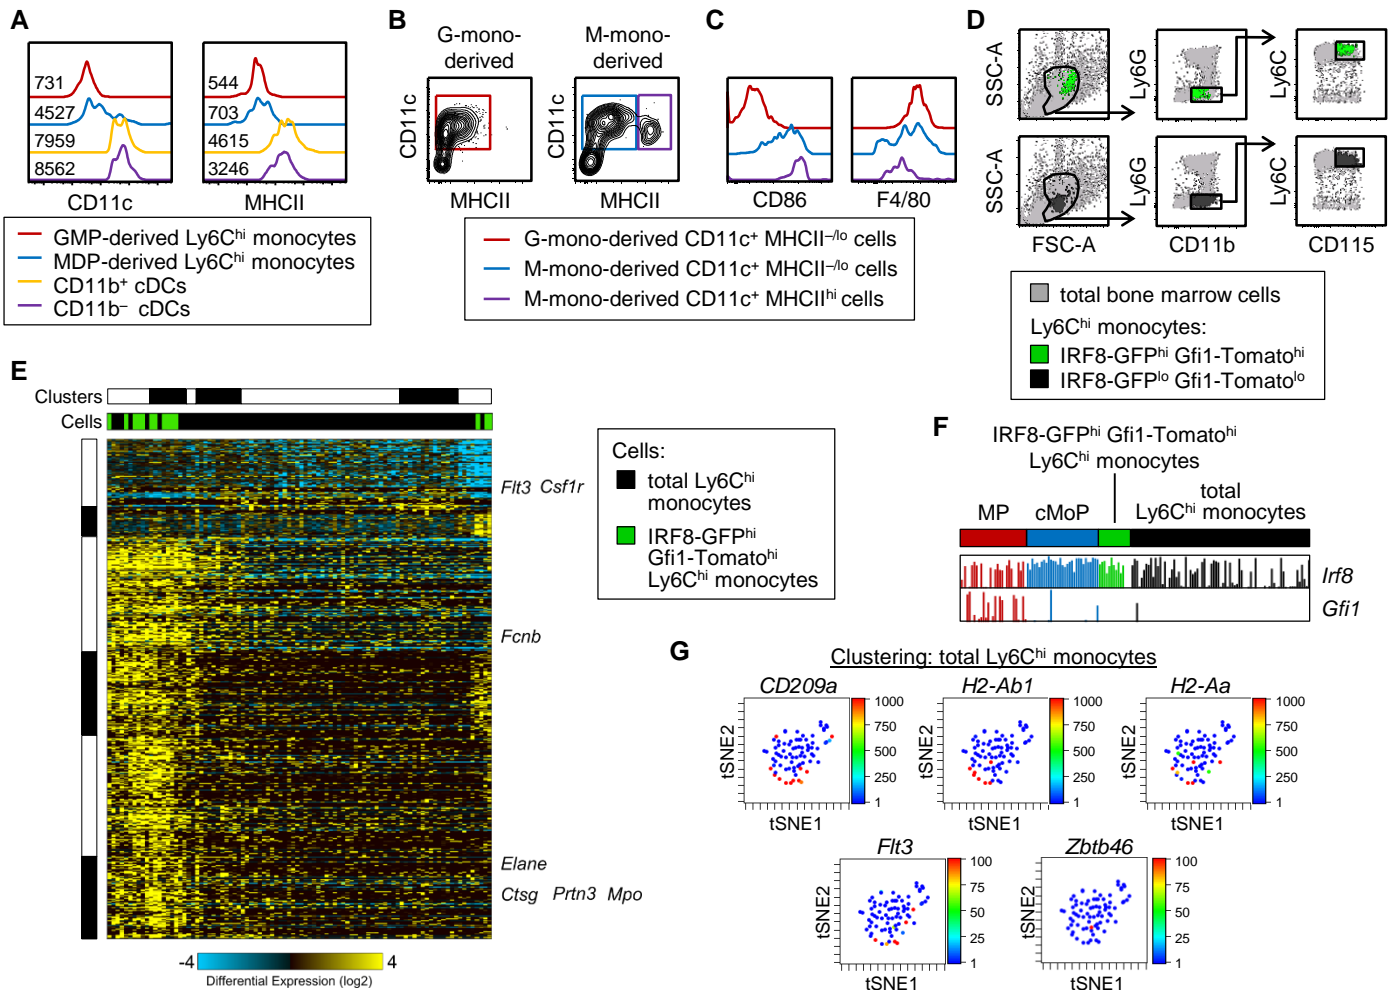**Figure S7. Single-cell RNA sequencing of Ly6C<sup>hi</sup> monocytes. (related to Figures 4-6)**

(A) CD11c (surface) and MHCII (surface and intracellular) expression by splenic Ly6C<sup>hi</sup> monocytes derived from adoptively transferred GMPs and MDPs, as well as endogenous DCs, was assessed by flow cytometry. MFI values are indicated. (B-C) Ly6C<sup>hi</sup> monocytes were sorted from 3-day *in vitro* cultures of GMPs and MDPs with M-CSF, and then cultured with GM-CSF for a further 4 days prior to assessment of CD11c and MHCII expression by flow cytometry (B). CD86 and F4/80 expression by subsets of CD11c<sup>+</sup> cells was also assessed by flow cytometry (C). (D) Back-gating of Ly6C<sup>hi</sup> monocyte subsets from IRF8-GFP Gfi1-tdTomato reporter mouse bone marrow. (E-G) Gene expression by Ly6C<sup>hi</sup> monocytes from the bone marrow of wild-type and IRF8-GFP Gfi1-tdTomato reporter mice (78 and 14 monocytes, respectively) was assessed by single-cell RNA sequencing. (E) Unsupervised clustering of Ly6C<sup>hi</sup> monocytes using ICGS in AltAnalyze. (F) Comb plots of transcription factor expression by individual Ly6C<sup>hi</sup> monocytes and monocyte progenitors. (G) Total wild-type Ly6C<sup>hi</sup> monocytes were also clustered using Cytobank (tSNE plots are shown). Clustering was performed using 252 genes that were differentially expressed in GMP- and MDP-derived Ly6C<sup>hi</sup> monocytes (G-mono<sup>UP</sup> and M-mono<sup>UP</sup> genes identified by bulk sequencing) and also detected by single-cell RNA sequencing. Expression intensities (log<sub>10</sub> RPKM) of moDC-producing monocyte markers (*CD209a*, *H2-Ab1*, *H2-Aa* and *Flt3*) and the cDC transcription factor *Zbtb46* are shown.
